# Supplementary material for: Synthesis, Structures and Properties of Cu(II) and Mn(II) Complexes with 1,10-Phenanthroline-2-carboxylic acid and 2,2’-Bipyridine Ligands
Source: Molecules. 2010 Nov 15;15(11):8349–59. doi: 10.3390/molecules15118349 (PMC6259098; doi:10.3390/molecules15118349)

**Synthesis, structures and properties of Cu(II) and Mn(II) complexes with  
1,10-phenanthroline-2-carboxylic acid and 2,2'-bipyridine ligand**

Jingya Sun, Huanzhi Xu

College of Marine Sciences, Zhejiang Ocean University, Zhoushan 316000, PR China

**Figure s1.** TG-DTG curve of complex 1.

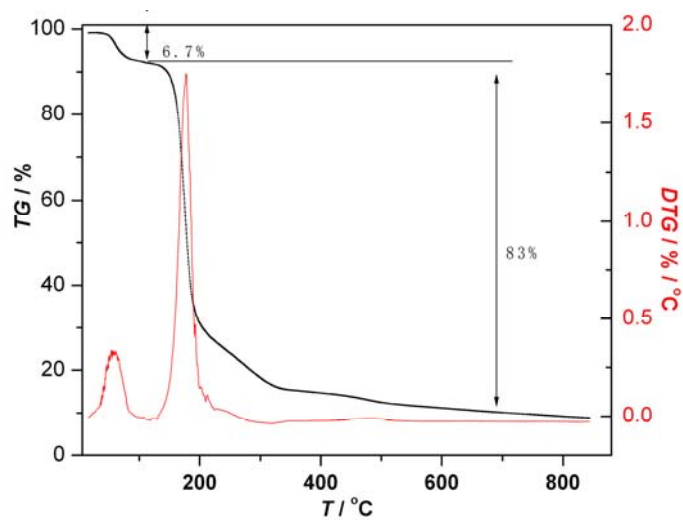

**Figure S2.** TG-DTG of curve of complex 2.

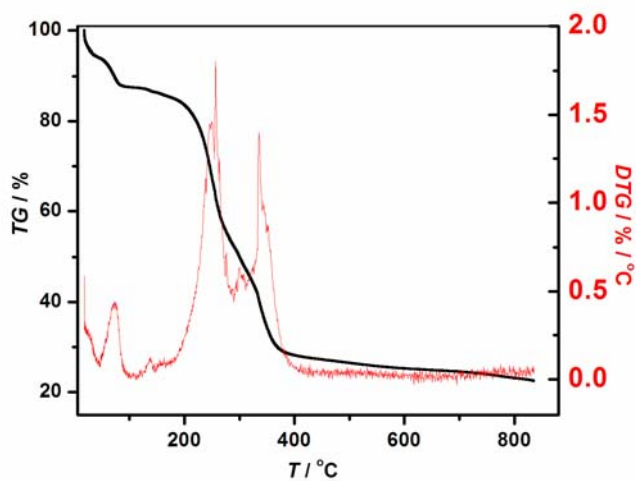

**Figure S3.** TG-DTG of curve of complex 3.

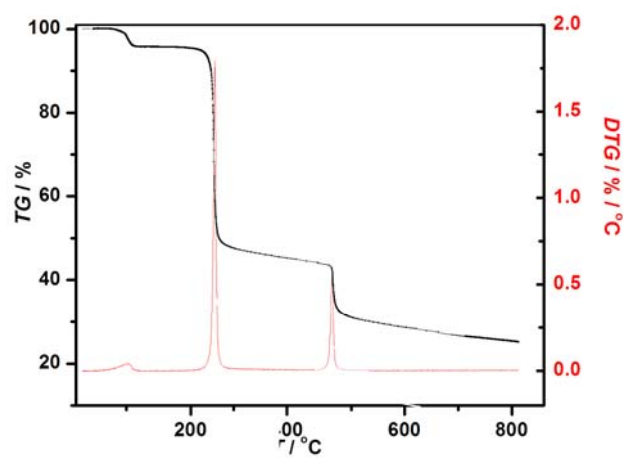

**Figure S4.** TG-DTG of curve of complex 4.

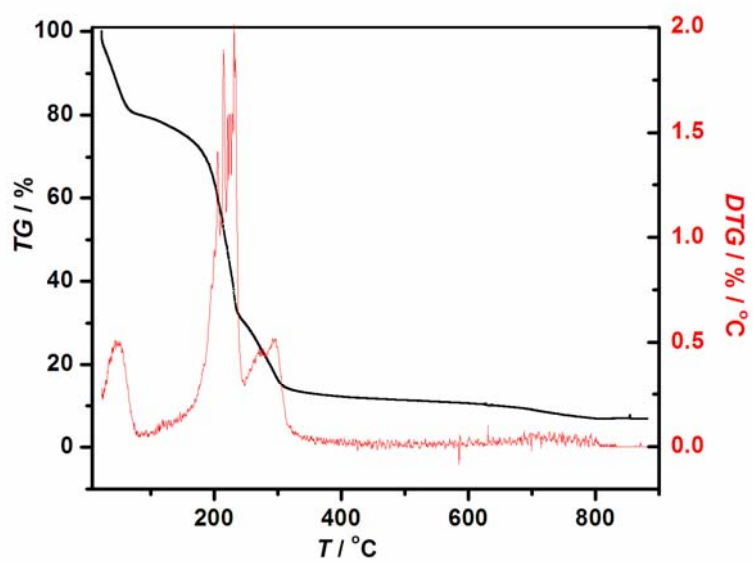

**Figure s5.** Projection of the crystal packing of polymorph 4 on the bc plane with perchlorate ion encapsulated within the channel.

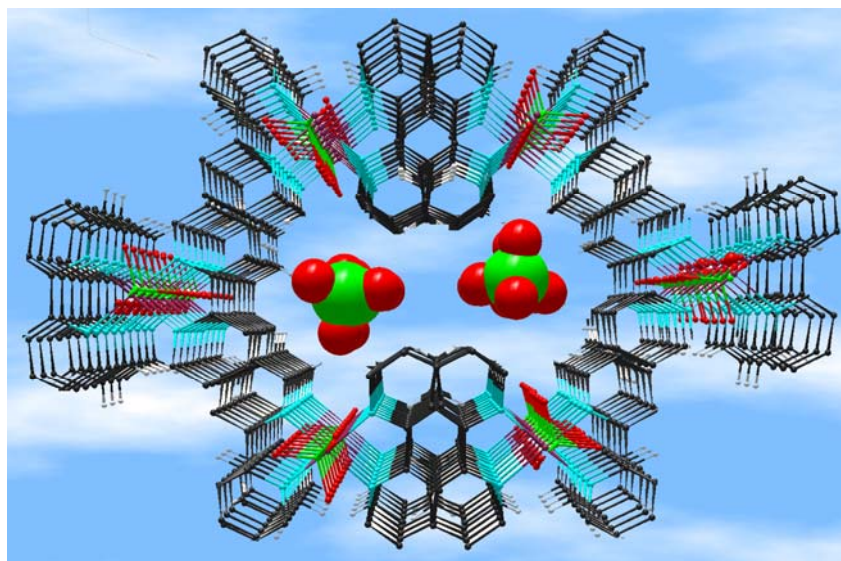

**Figure s6.** XRD pattern of (a) complex 4, (b) complex 4 treated with aqueous solution of  $\text{NaNO}_2$ , (c) complex 4 treated with aqueous solution of  $\text{KSCN}$ , (d) complex 4 treated with aqueous solution of  $\text{NaNO}_3$ .

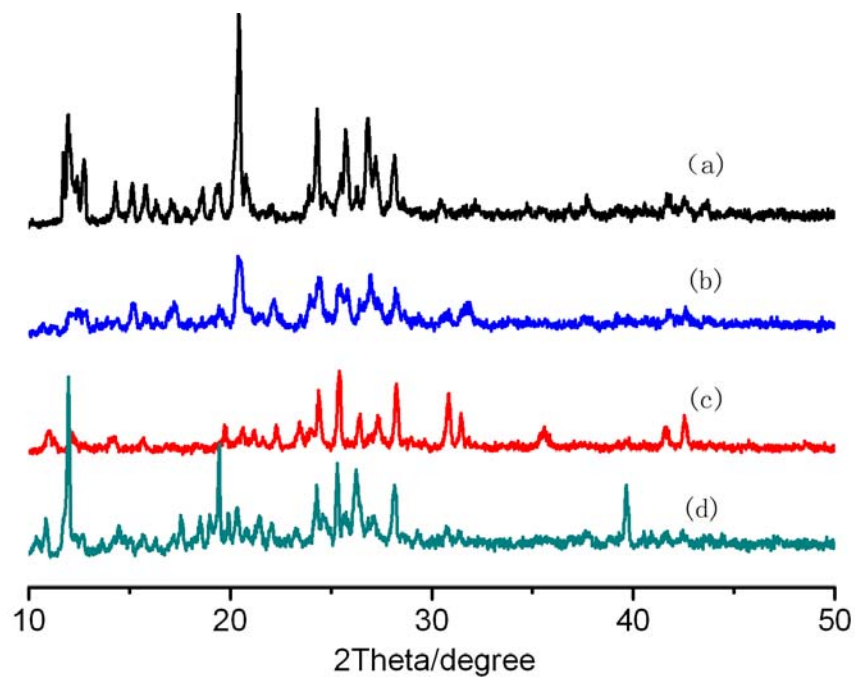

Supplement: Supplementary file 1 [file molecules-15-08349-s001.pdf]
